# Supplementary material
Source: PubMed Central journal article supplement (PMC6463520)
Supplement: NIHMS1524445-supplement-1.pdf [file NIHMS1524445-supplement-1.pdf]

**Cell Reports, Volume 25**

**Supplemental Information**

**Crystal Structure of the Double Homeodomain  
of DUX4 in Complex with DNA**

**John K. Lee, Darko Bosnakovski, Erik A. Toso, Tracy Dinh, Surajit Banerjee, Thomas E. Bohl, Ke Shi, Kayo Orellana, Michael Kyba, and Hideki Aihara**

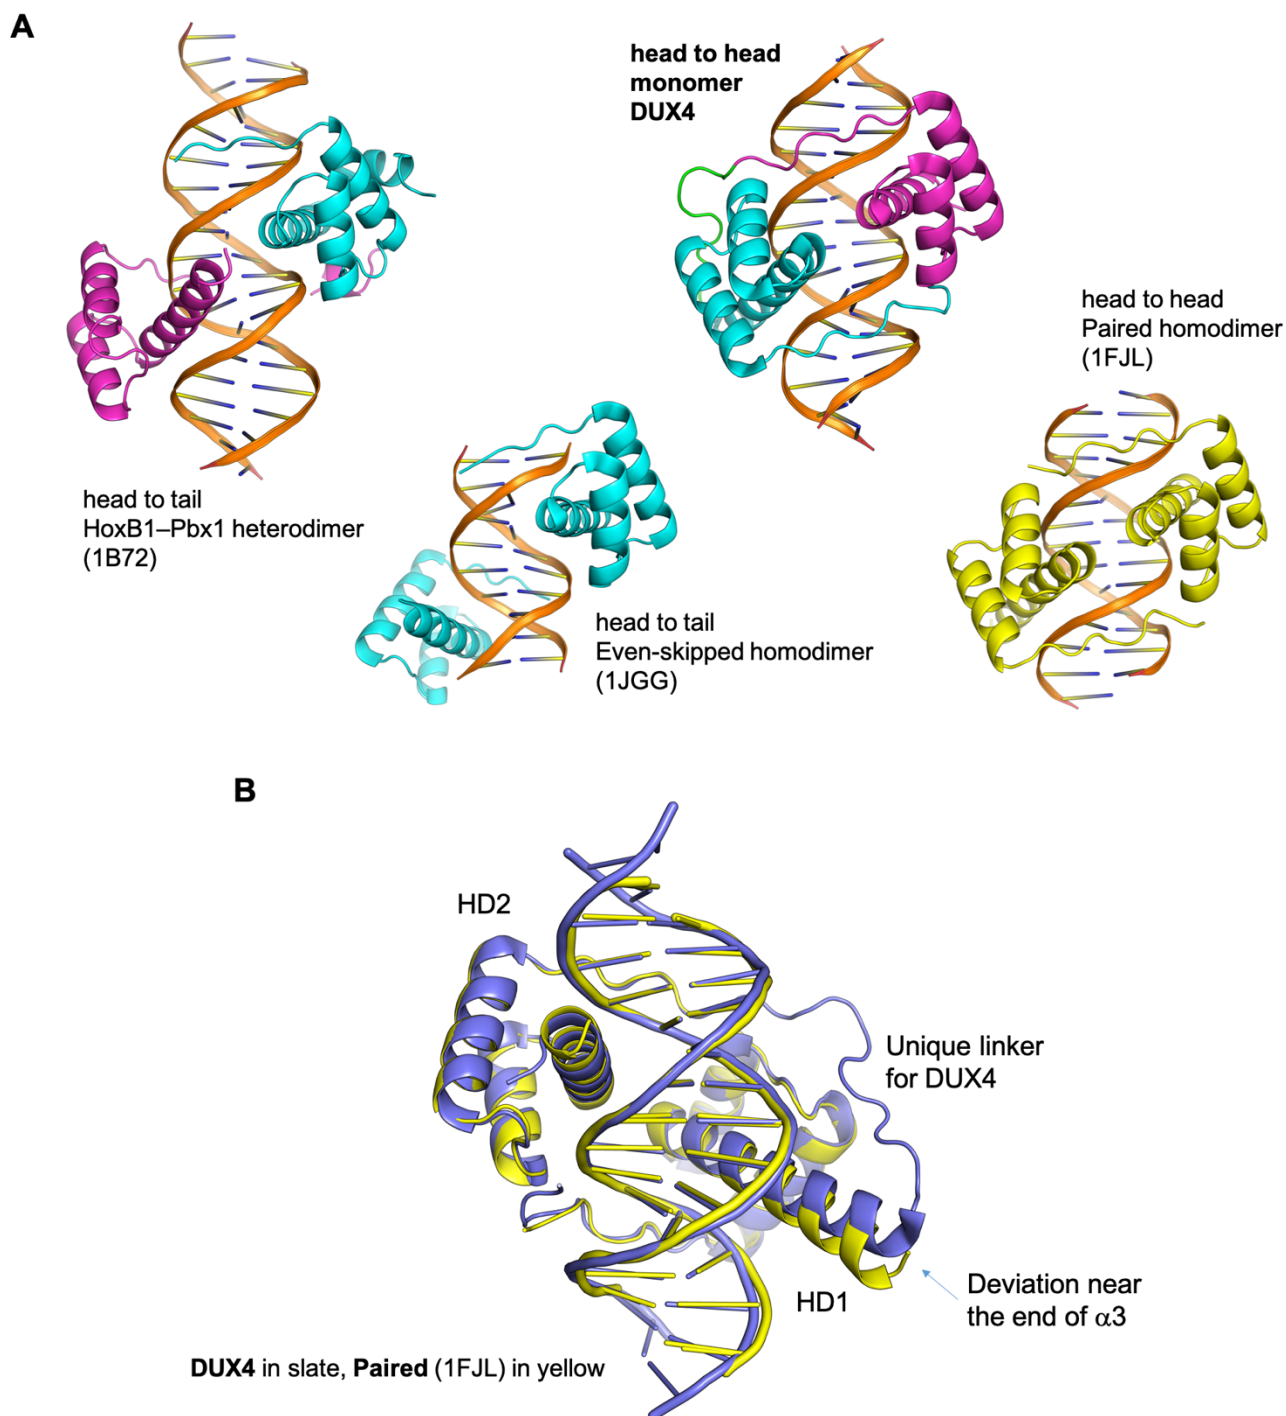

**Figure S1. Structures of various homeodomain-DNA complexes. Related to Figures 1 and 4.**

(A) Comparison of the homo-dimeric (Paired (Wilson et al., 1995), Even-skipped (Hirsch and Aggarwal, 1995)) or hetero-dimeric (HoxB1-Pbx1 (LaRonde-LeBlanc and Wolberger, 2003; Piper et al., 1999)) homeobox proteins with the DUX4 double-homeodomain. (B) Superposition of the *Drosophila* Paired homodimer-DNA complex (PDB ID: 1FJL) (Wilson et al., 1995) with the DUX4-DNA complex.

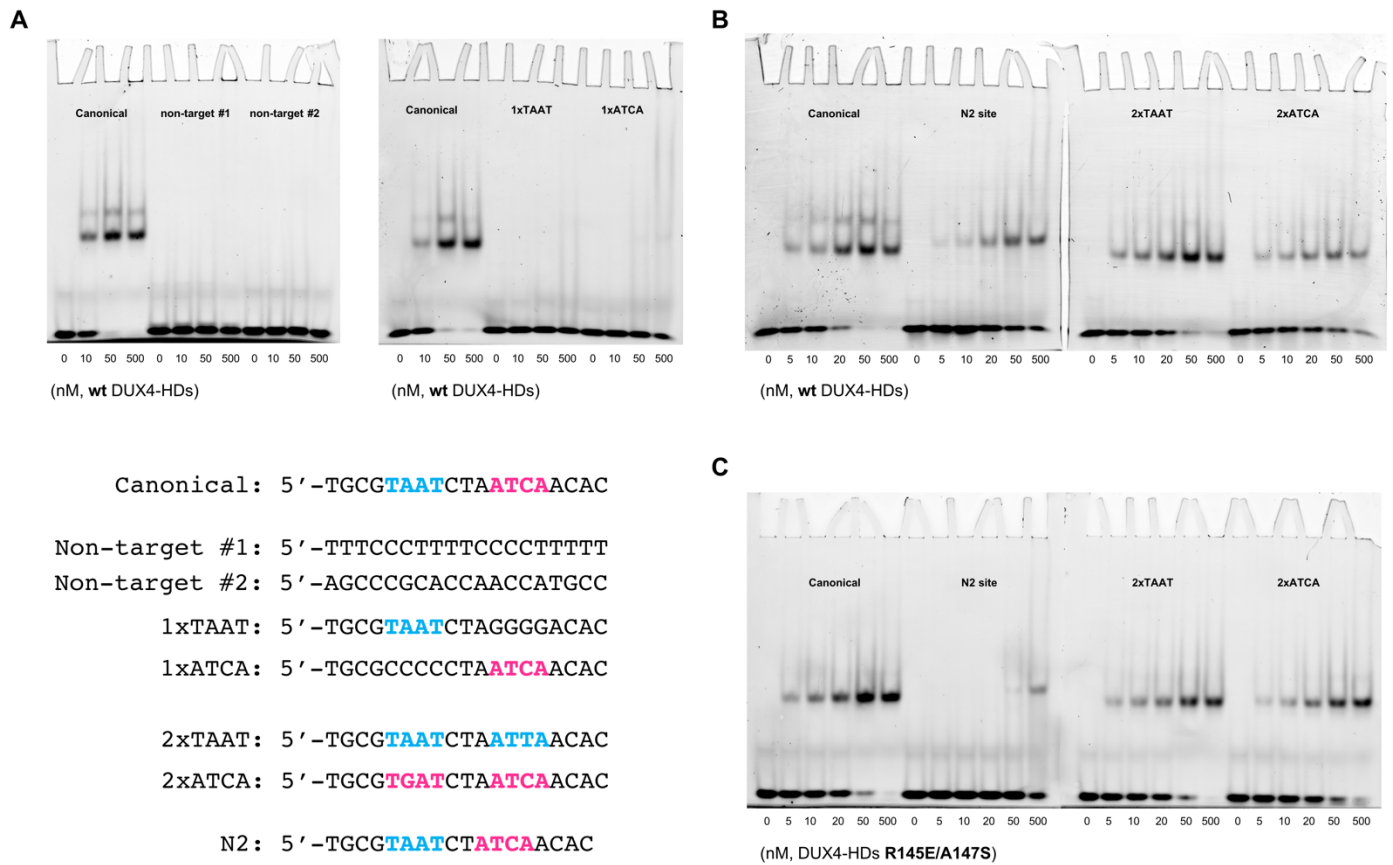

**Figure S2. *In vitro* DNA-binding analyses by electrophoretic mobility shift assay (EMSA). Related to Figure 2.** Proteins used were the crystallized wild-type DUX4(15-155) in (A, B) and DUX4(15-155) R145E/A147S mutant in (C). DNA sequences of the fluorescently labeled probes are shown on the lower left. They were annealed with unlabeled complementary oligos to generate double-stranded DNA substrates.



**Table S1. Data collection and refinement statistics. Related to Method Details.**

---

| <b>Data collection</b>                                  |                                         |
|---------------------------------------------------------|-----------------------------------------|
| Space group                                             | C222 <sub>1</sub>                       |
| Cell dimensions                                         |                                         |
| <i>a</i> , <i>b</i> , <i>c</i> (Å)                      | 67.19 73.14 108.56                      |
| Wavelength (Å)                                          | 0.9792                                  |
| Resolution (Å)                                          | 36.57 - 2.12 (2.20 - 2.12) <sup>a</sup> |
| <i>R</i> <sub>merge</sub>                               | 0.073 (1.37)                            |
| <i>I</i> / $\sigma$ <i>I</i>                            | 20.2 (2.3)                              |
| Completeness (%)                                        | 97.2 (83.0)                             |
| Redundancy                                              | 17.2 (13.6)                             |
| <br><b>Refinement</b>                                   |                                         |
| Resolution (Å)                                          | 36.57 - 2.12 (2.20 - 2.12)              |
| No. reflections                                         | 15091                                   |
| <i>R</i> <sub>work</sub> / <i>R</i> <sub>free</sub> (%) | 19.8 / 24.7                             |
| No. non-H atoms                                         | 1860                                    |
| Protein                                                 | 1117                                    |
| DNA                                                     | 691                                     |
| Ligand                                                  | 4                                       |
| Solvent                                                 | 48                                      |
| <i>B</i> -factor                                        | 66.10                                   |
| Protein                                                 | 67.14                                   |
| DNA                                                     | 65.09                                   |
| Ligand/ion                                              | 90.09                                   |
| Solvent                                                 | 54.59                                   |
| R.m.s. deviations                                       |                                         |
| Bond lengths (Å)                                        | 0.011                                   |
| Bond angles (°)                                         | 1.12                                    |

---

<sup>a</sup>Values in parentheses are for highest-resolution shell.
